# Supplementary material for: Antimicrobial therapy of 3 days or less is sufficient after successful ERCP for acute cholangitis
Source: PubMed Central journal article supplement — United European Gastroenterol J. 2020 Mar 17;8(4):481–8. doi: 10.1177/2050640620915016 (PMC7226689; doi:10.1177/2050640620915016), 2020-03-17
Supplement: UEG915016_Supplemental_Material.pdf [file UEG915016_Supplemental_Material.pdf]

| <b>Supplemental Table 1: Bacterial species and antibiotics</b>          |              |                    |                    |
|-------------------------------------------------------------------------|--------------|--------------------|--------------------|
|                                                                         | <b>Total</b> | <b>≤ 3 days AB</b> | <b>≥ 4 days AB</b> |
| <b>Most commonly isolated pathogens*, n (%)</b>                         |              |                    |                    |
| - <i>Escherichia coli</i>                                               | 108 (67.5)   | 40 (64.5)          | 68 (69.4)          |
| - <i>Klebsiella species</i>                                             | 39 (24.4)    | 13 (21.0)          | 26 (26.5)          |
| - <i>Streptococcus species</i>                                          | 13 (8.1)     | 6 (9.7)            | 7 (7.1)            |
| - <i>Enterococcus species</i>                                           | 7 (4.4)      | 1 (1.6)            | 6 (6.1)            |
| - <i>Enterobacter species</i>                                           | 6 (3.8)      | 2 (3.2)            | 4 (4.1)            |
| - <i>Other</i>                                                          | 12 (7.5)     | 3 (4.8)            | 9 (9.2)            |
| ○ <i>Anaerobes</i>                                                      | 2 (1.3)      | 0 (0)              | 2 (2)              |
| <b>Most commonly used empirical antibiotics, n (%)</b>                  |              |                    |                    |
| - Piperacillin/tazobactam                                               | 49 (16.6)    | 26 (19.0)          | 23 (14.5)          |
| - Ceftriaxone plus metronidazole                                        | 42 (14.2)    | 21 (15.3)          | 21 (13.2)          |
| - Amoxicillin/clavulanic acid                                           | 42 (14.2)    | 15 (10.9)          | 27 (17.0)          |
| - Ceftriaxone plus gentamicin                                           | 35 (11.8)    | 24 (17.5)          | 11 (6.9)           |
| - Ceftriaxone                                                           | 35 (11.8)    | 16 (11.7)          | 19 (11.9)          |
| - Amoxicillin/clavulanic acid plus gentamicin                           | 34 (11.5)    | 14 (10.2)          | 20 (12.6)          |
| - Amoxicillin/clavulanic acid plus ciprofloxacin                        | 32 (10.8)    | 9 (6.6)            | 23 (14.5)          |
| - Other                                                                 | 27 (9.1)     | 12 (8.8)           | 15 (9.4)           |
| *The percentages are derived from the number of positive blood cultures |              |                    |                    |
